# Supplementary material for: FTIR and Raman Spectroscopy-Based Biochemical Profiling Reflects Genomic Diversity of Clinical Candida Isolates That May Be Useful for Diagnosis and Targeted Therapy of Candidiasis
Source: MDPI journal article supplement (doi:10.3390/ijms20040988), 2019-02-25
Supplement: s1 [file s1]

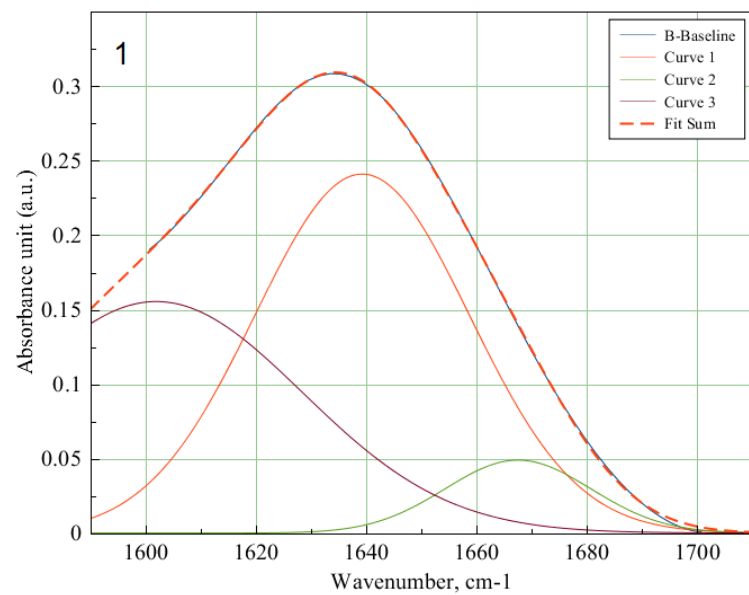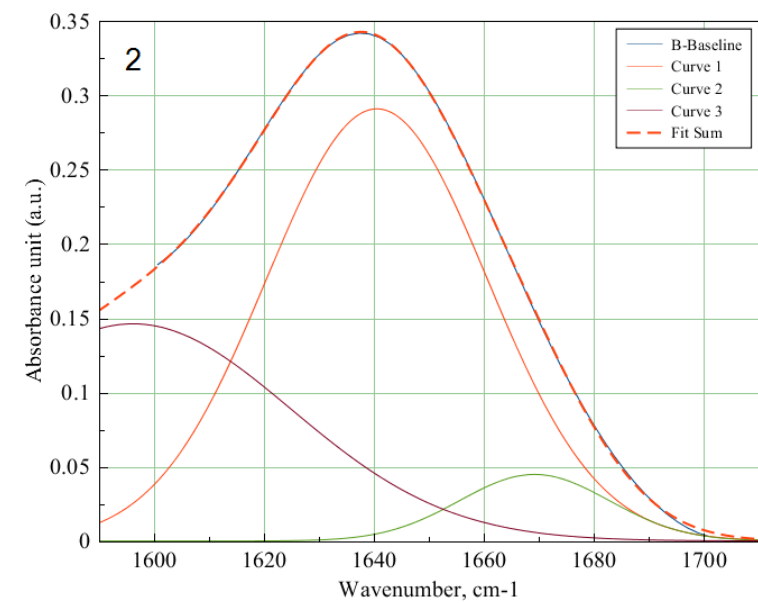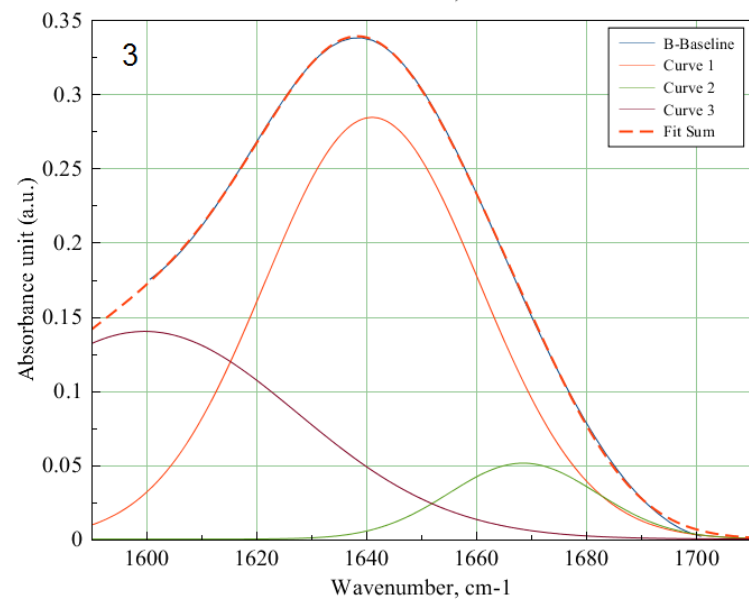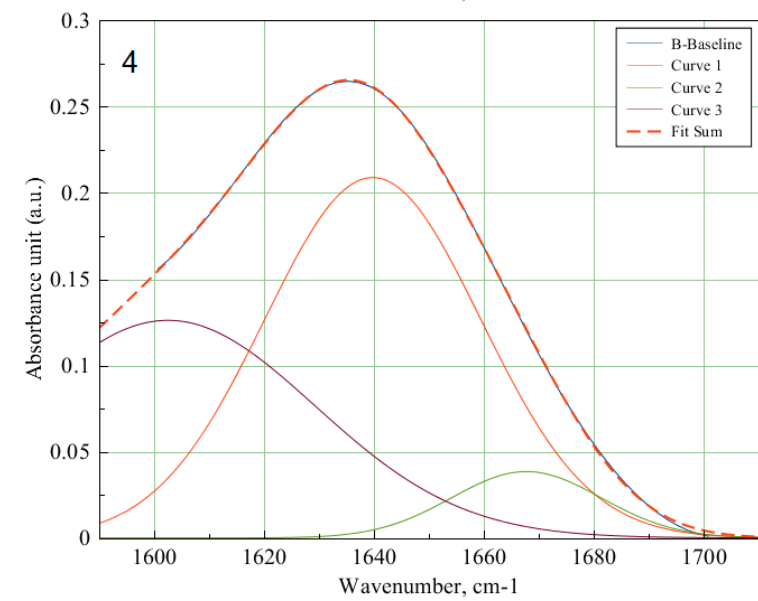

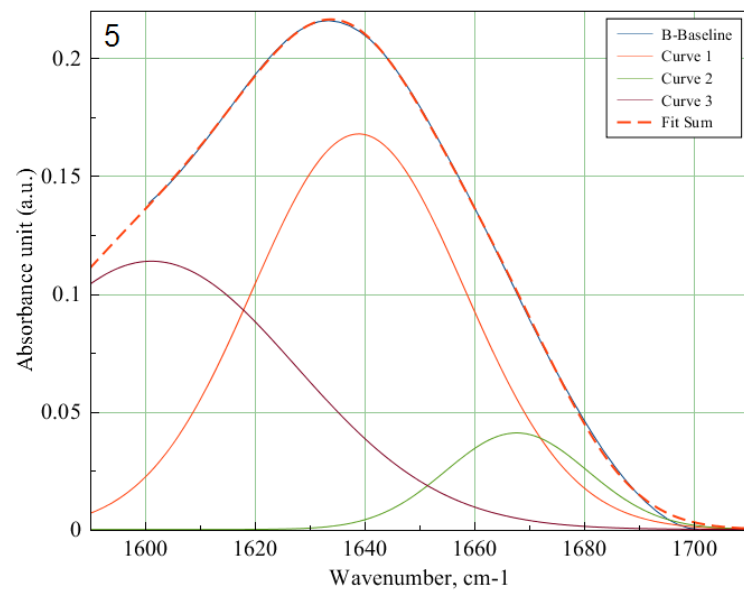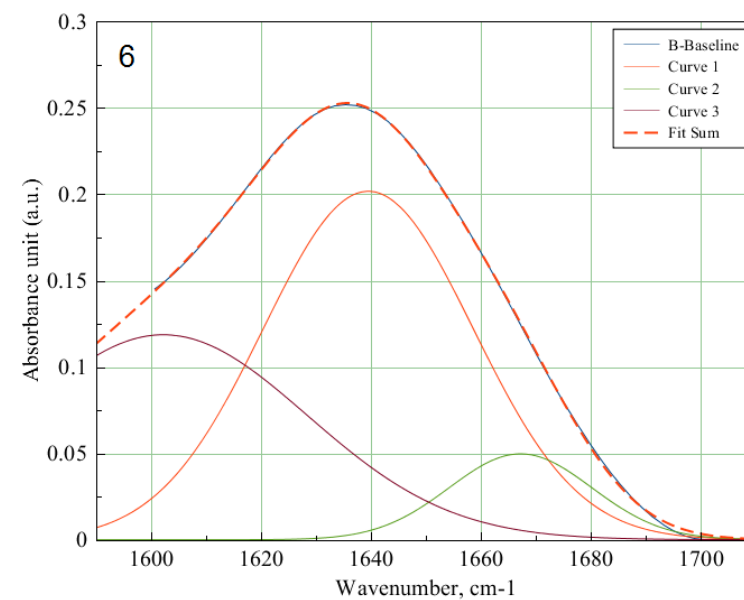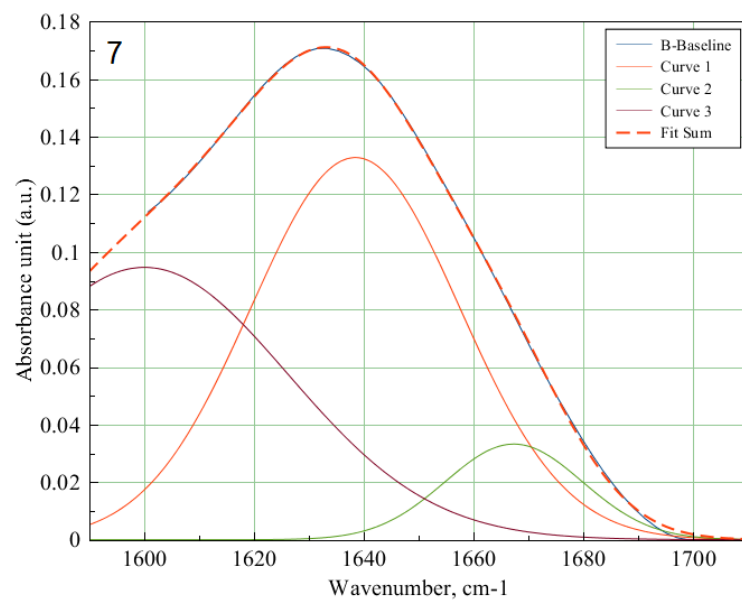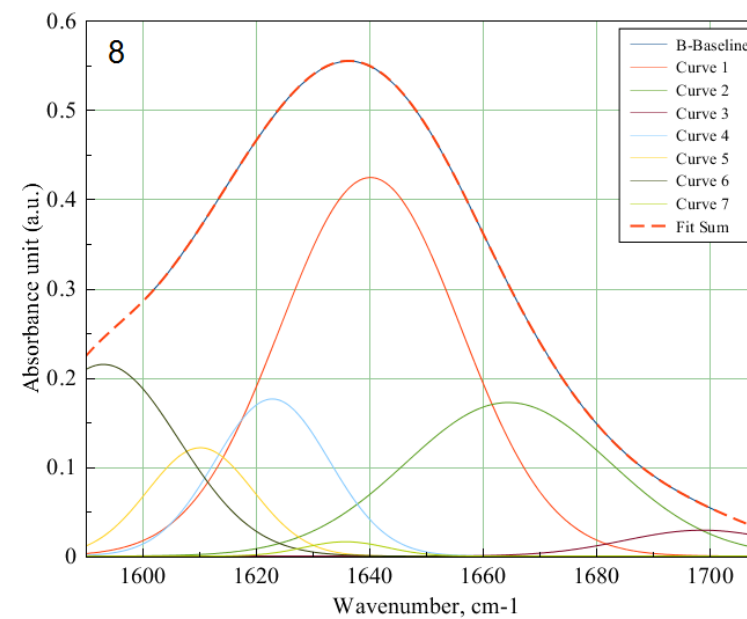

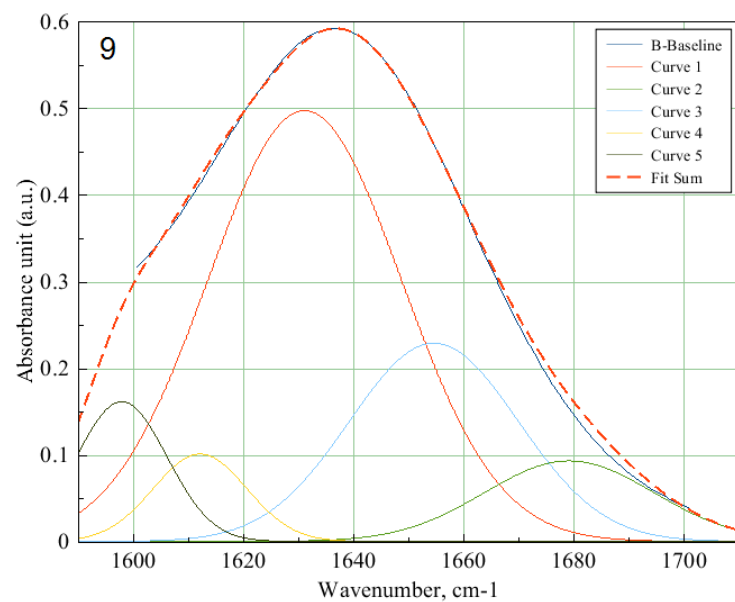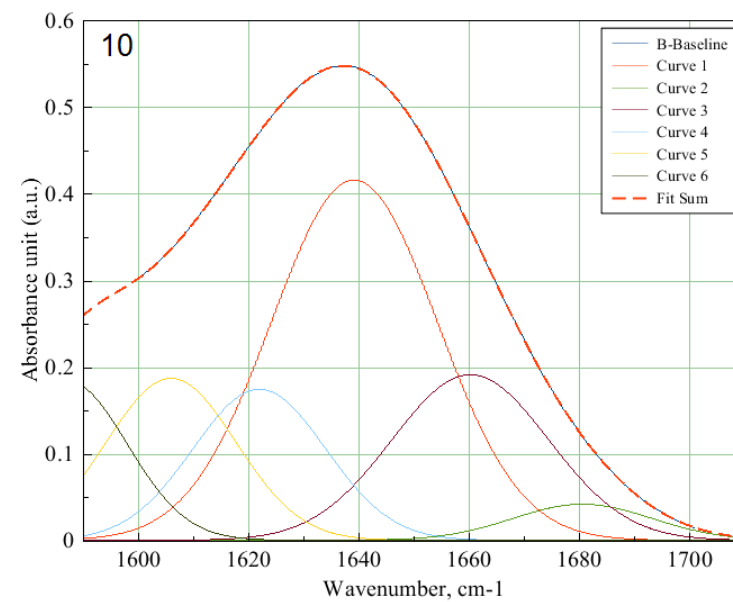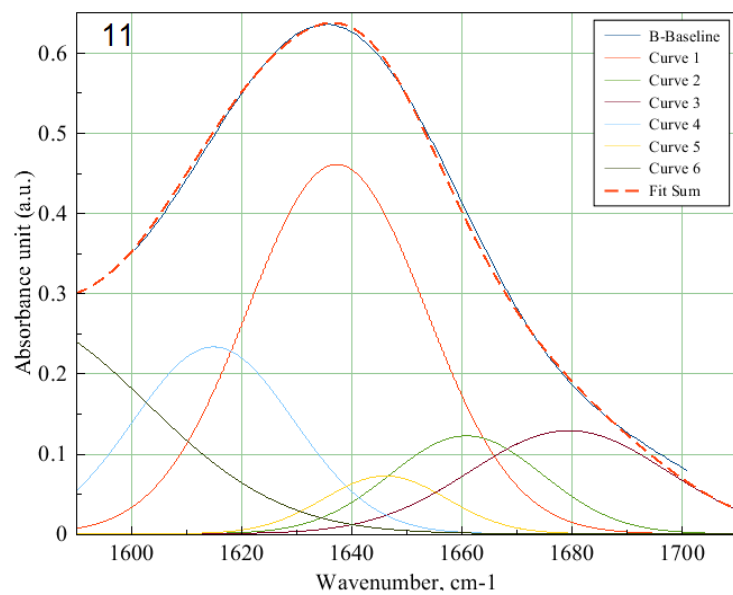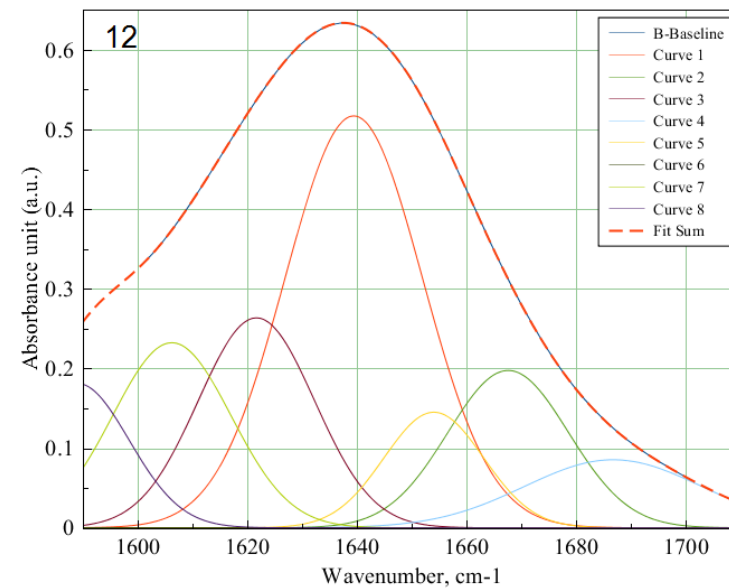

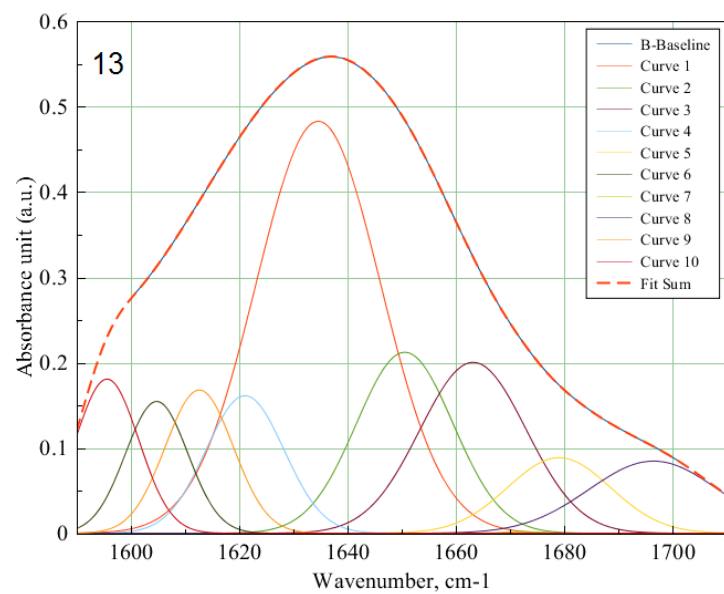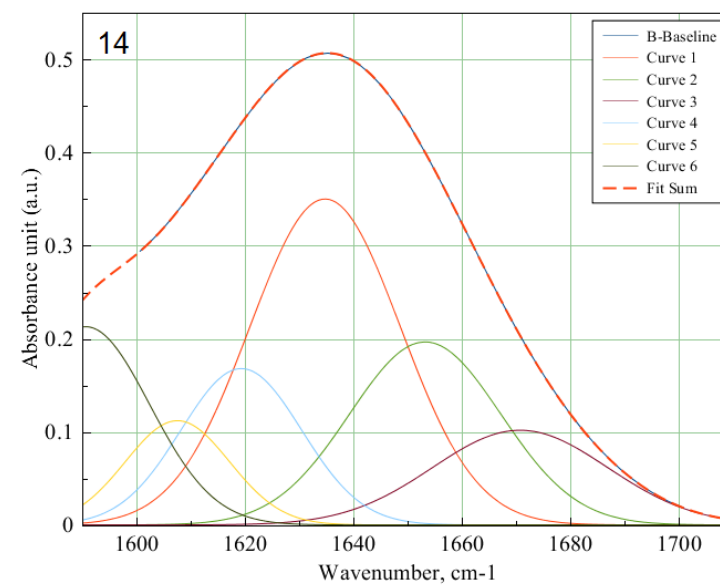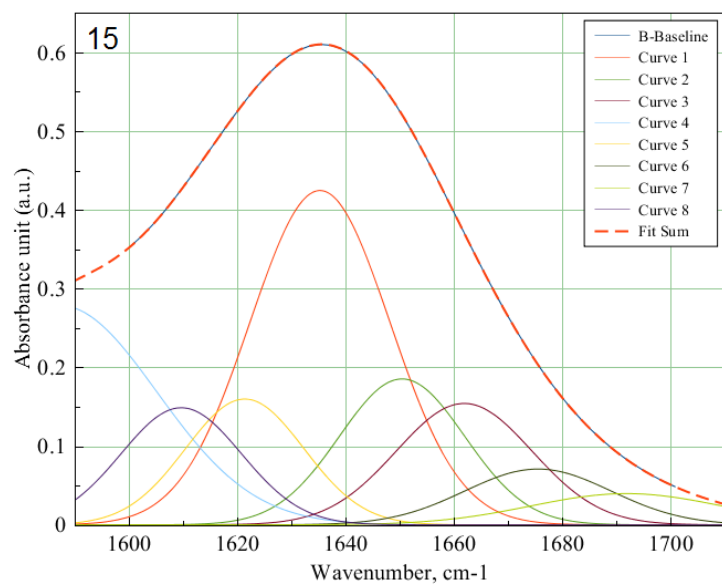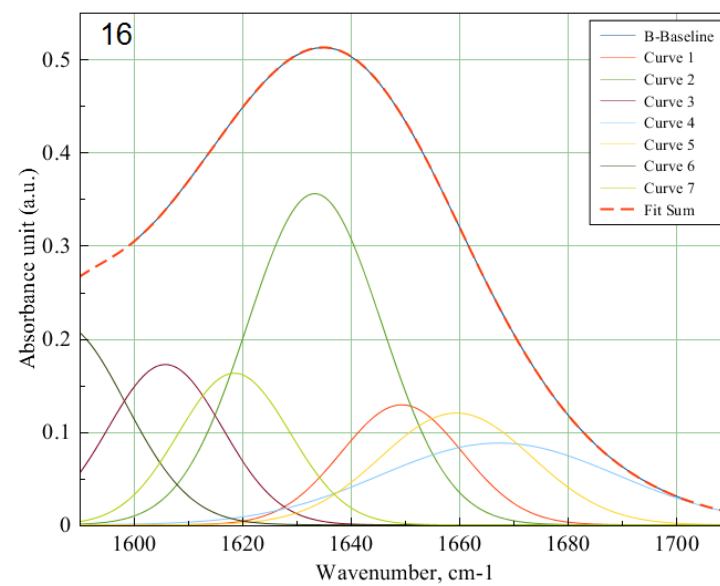

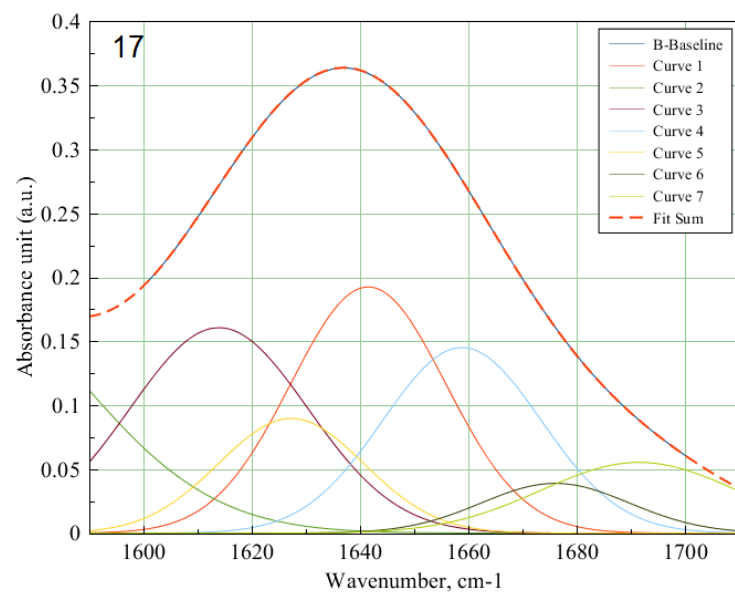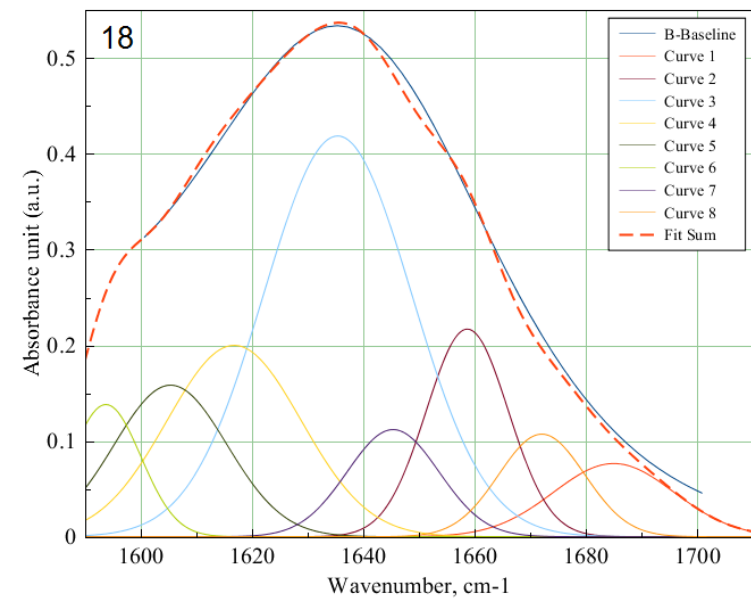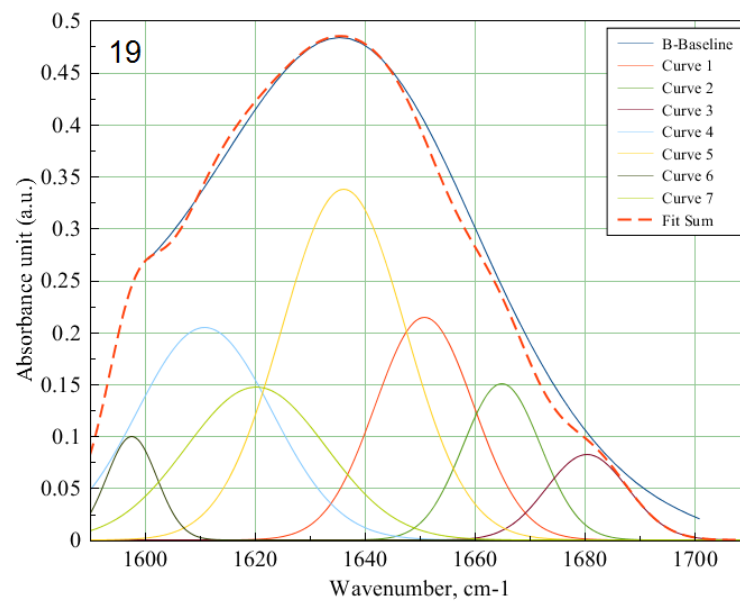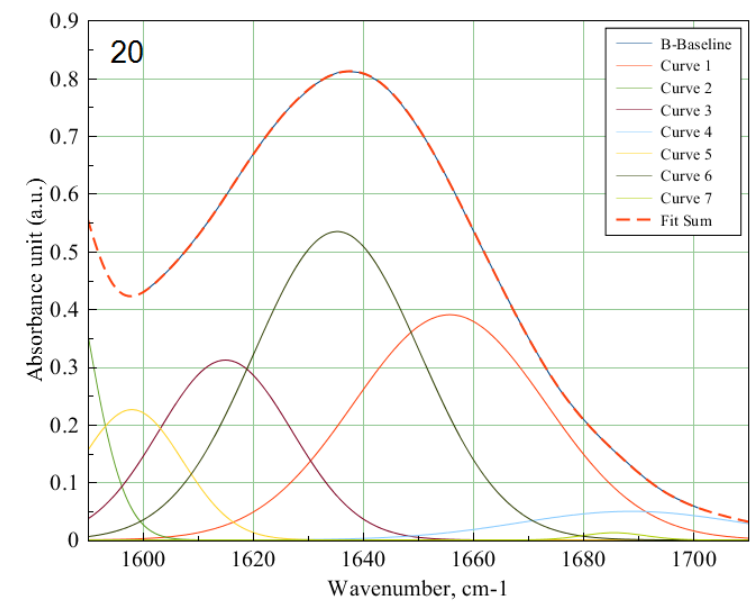

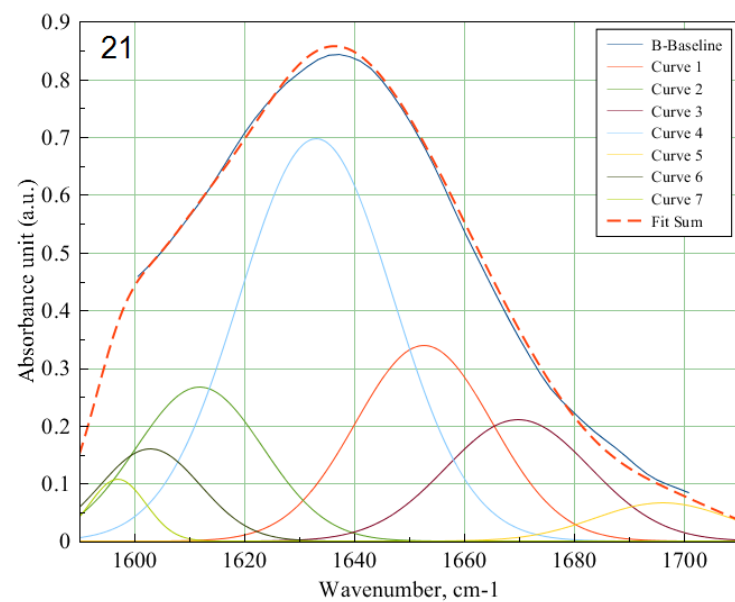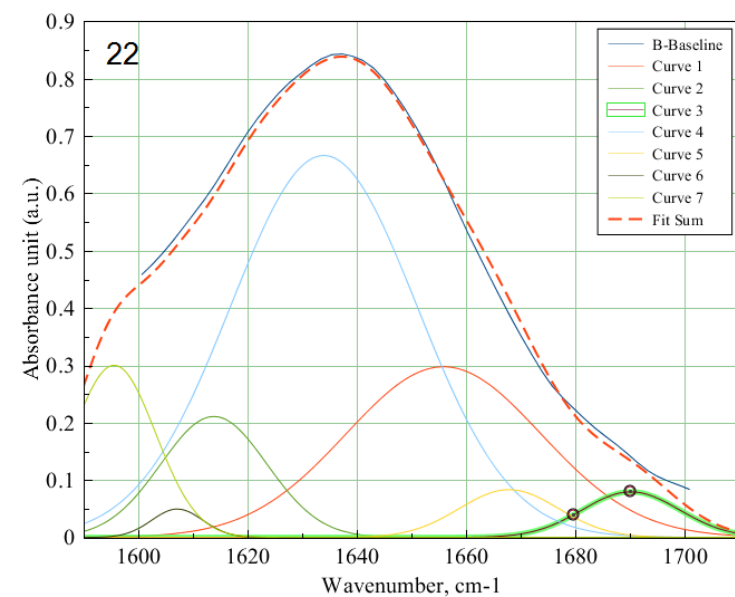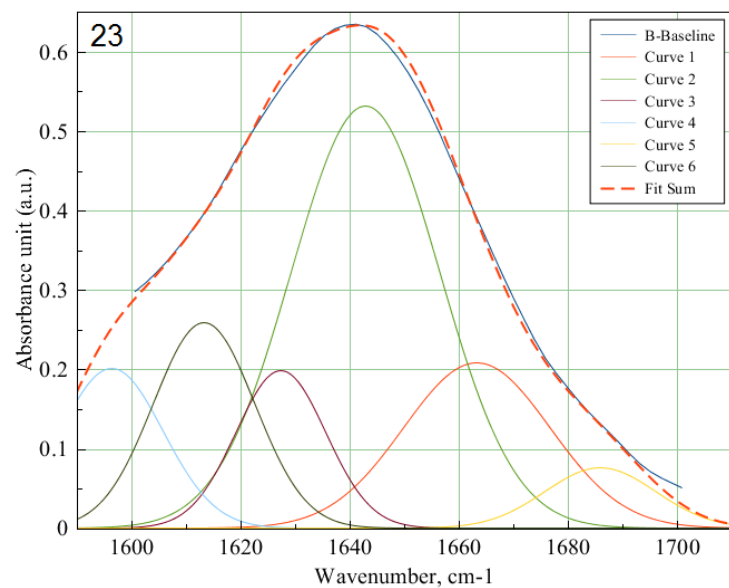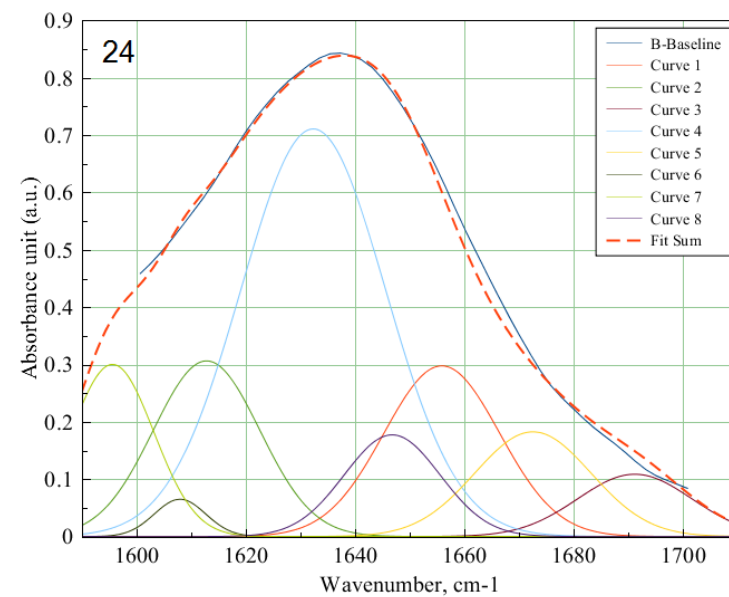

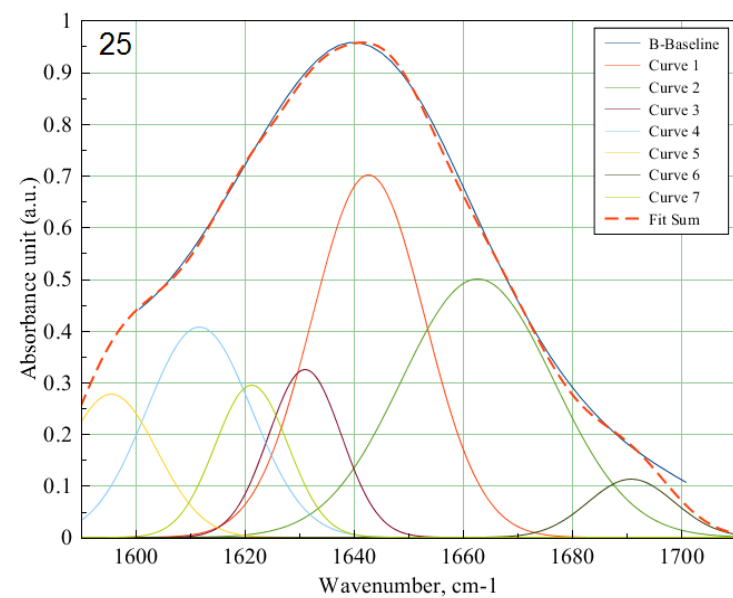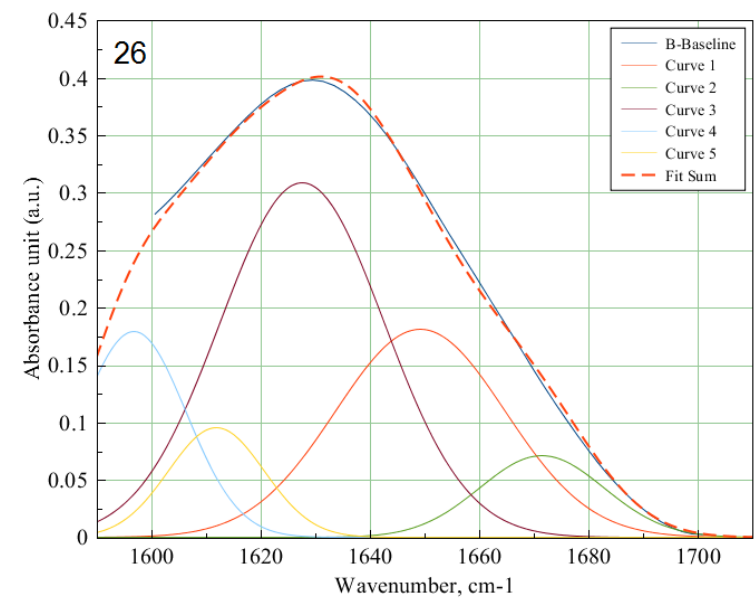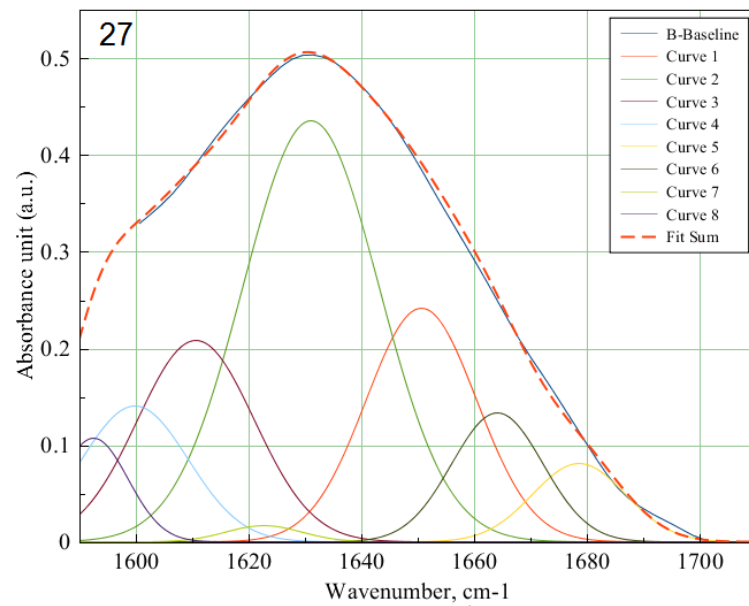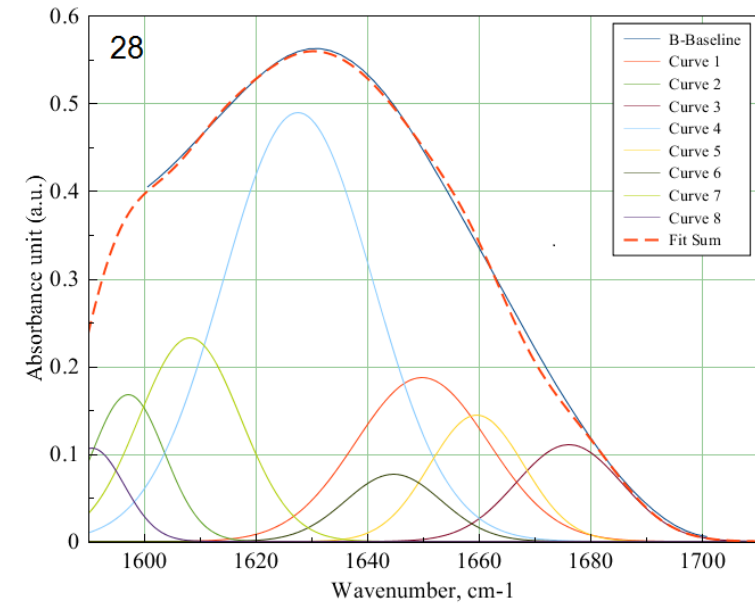

**Supplemental Figure 3.** Spectra of component bands of amide I FTIR region of clinical *Candida* isolates and reference strains (1-28).
