# Supplementary material for: FTIR and Raman Spectroscopy-Based Biochemical Profiling Reflects Genomic Diversity of Clinical Candida Isolates That May Be Useful for Diagnosis and Targeted Therapy of Candidiasis
Source: Int J Mol Sci. 2019 Feb 25;20(4):988. doi: 10.3390/ijms20040988 (PMC6412866; doi:10.3390/ijms20040988)
Supplement: Supplementary file 1 [file ijms-20-00988-s001.zip]

Archive with 13 entries (11 files):
- ijms-439484-supplementary (english edits)/
- ijms-439484-supplementary (english edits)/Nowy folder/
- ijms-439484-supplementary (english edits)/Nowy folder/Supplemental Figure 1.pdf
- ijms-439484-supplementary (english edits)/Nowy folder/Supplemental Figure 2.pdf
- ijms-439484-supplementary (english edits)/Nowy folder/Supplemental Figure 3.pdf
- ijms-439484-supplementary (english edits)/Nowy folder/Supplemental Table 1 (english edits).doc
- ijms-439484-supplementary (english edits)/Nowy folder/Supplemental Table 1.doc
- ijms-439484-supplementary (english edits)/Nowy folder/Supplemental Table 2 (english edits).doc
- ijms-439484-supplementary (english edits)/Nowy folder/Supplemental Table 2.doc
- ijms-439484-supplementary (english edits)/Nowy folder/Supplemental Table 3 (English edits).doc
- ijms-439484-supplementary (english edits)/Nowy folder/Supplemental Table 3.doc
- ijms-439484-supplementary (english edits)/Nowy folder/Supplemental Table 4 (English edits).doc
- ijms-439484-supplementary (english edits)/Nowy folder/Supplemental Table 4.doc
