# Supplementary figures and images for: FTIR and Raman Spectroscopy-Based Biochemical Profiling Reflects Genomic Diversity of Clinical Candida Isolates That May Be Useful for Diagnosis and Targeted Therapy of Candidiasis
Source: MDPI journal article supplement (doi:10.3390/ijms20040988), 2019-02-25

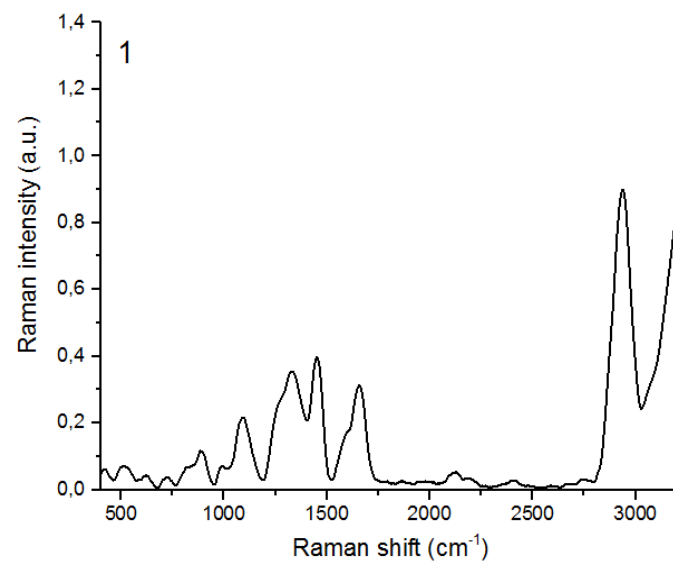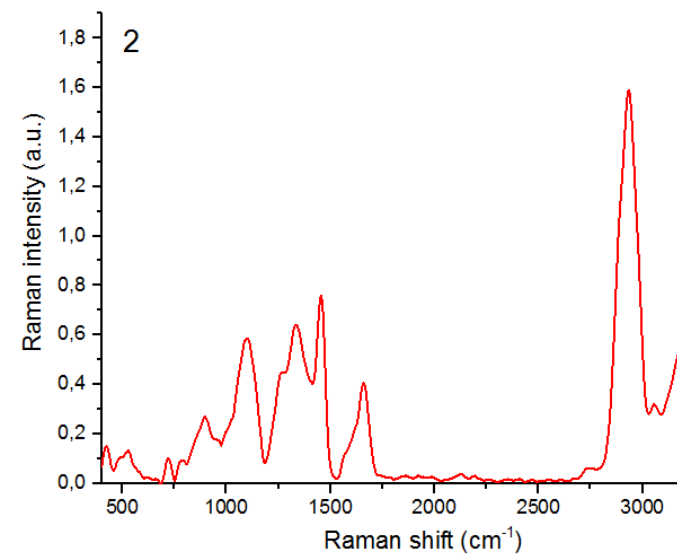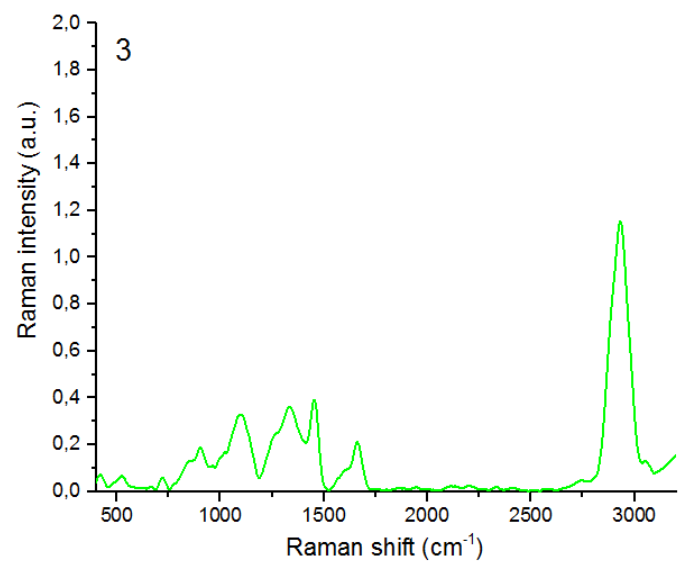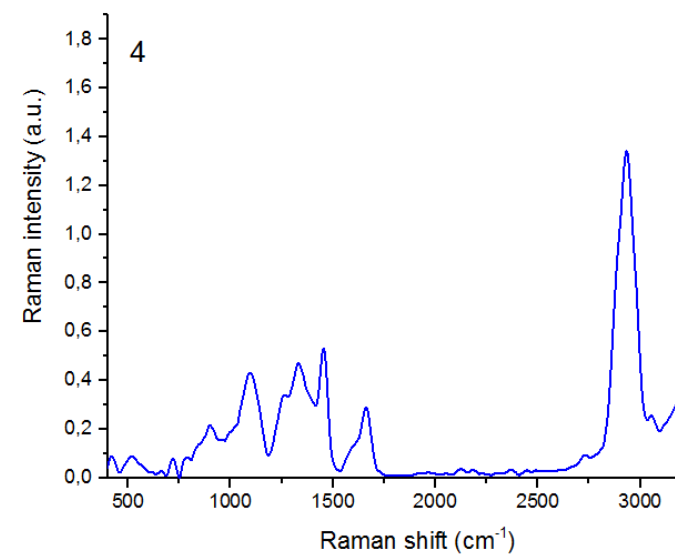

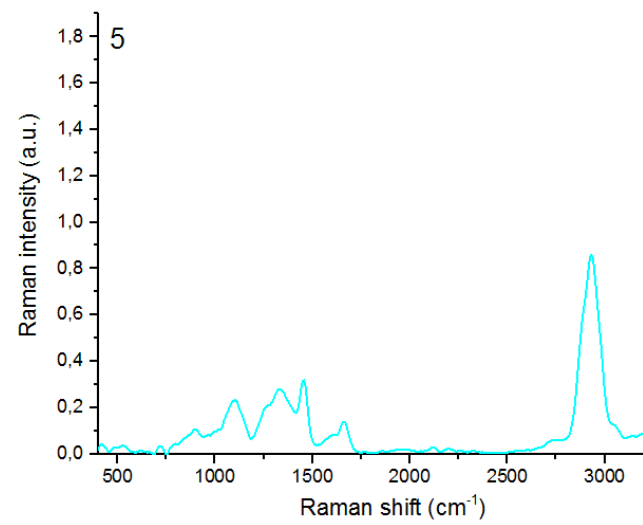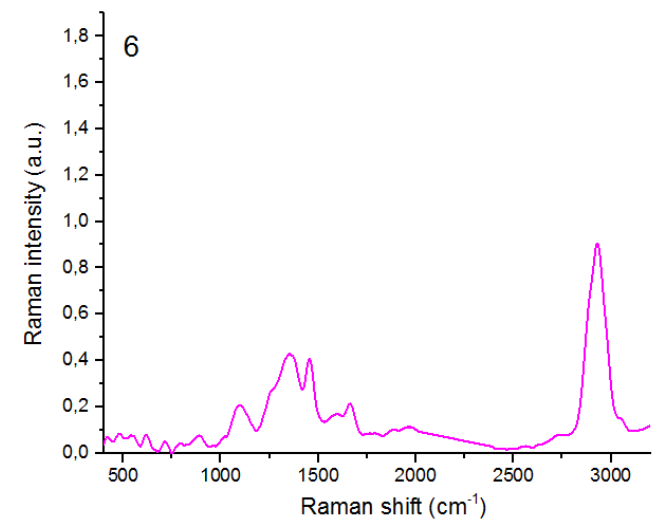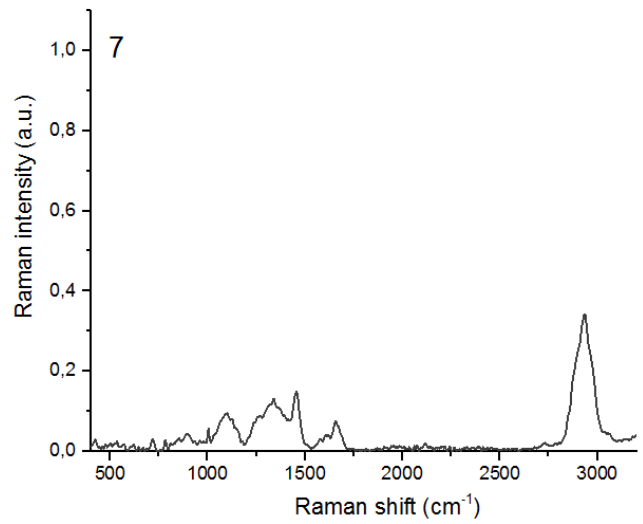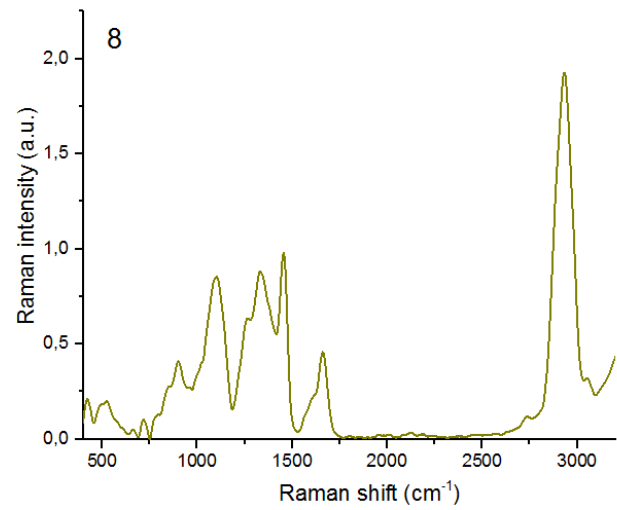

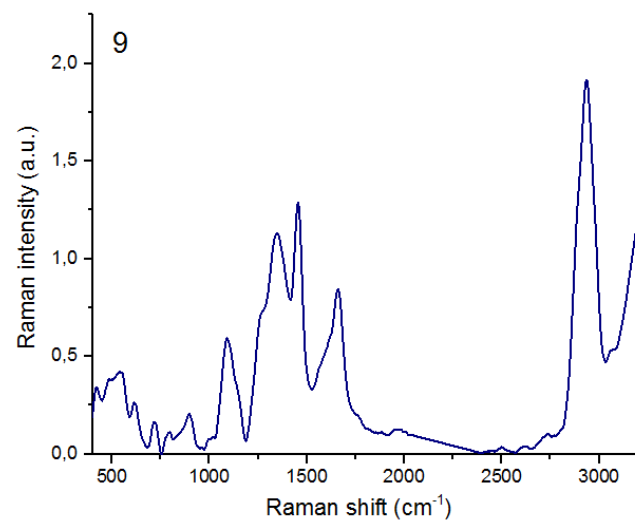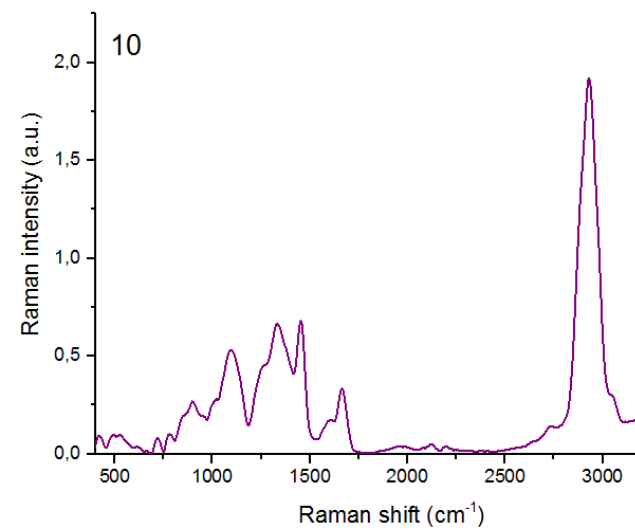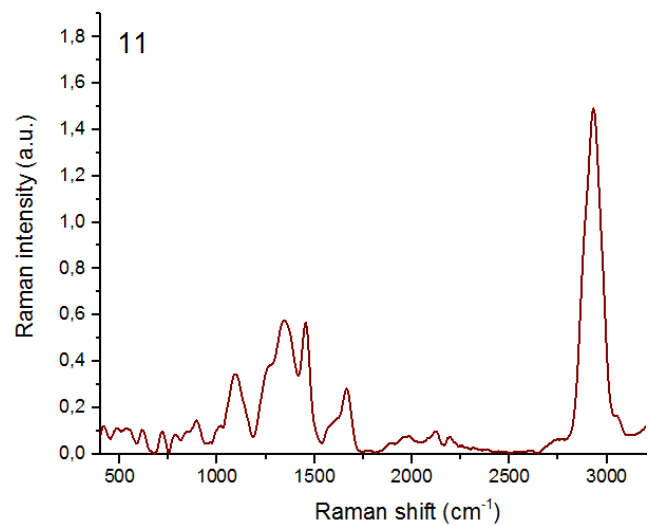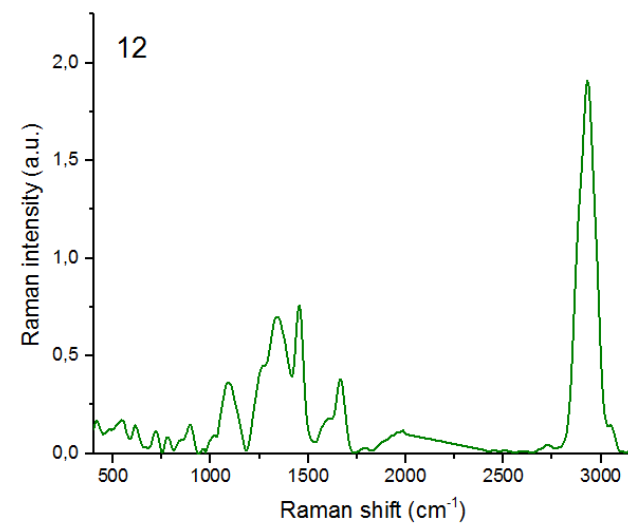

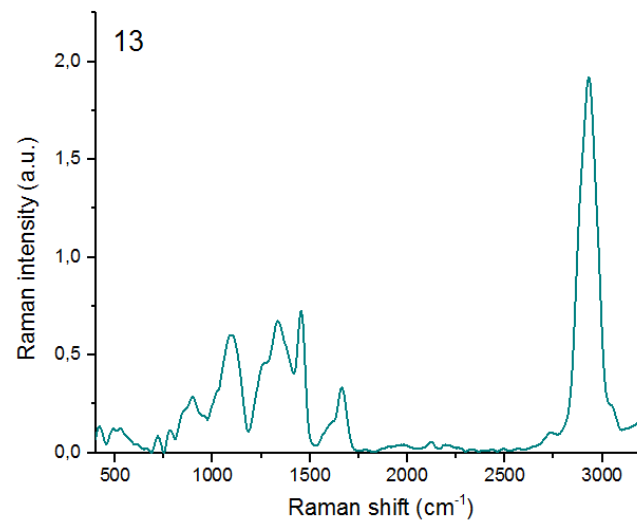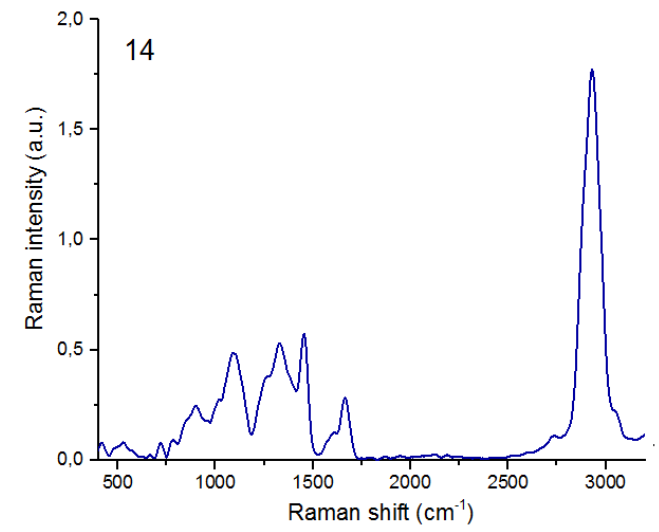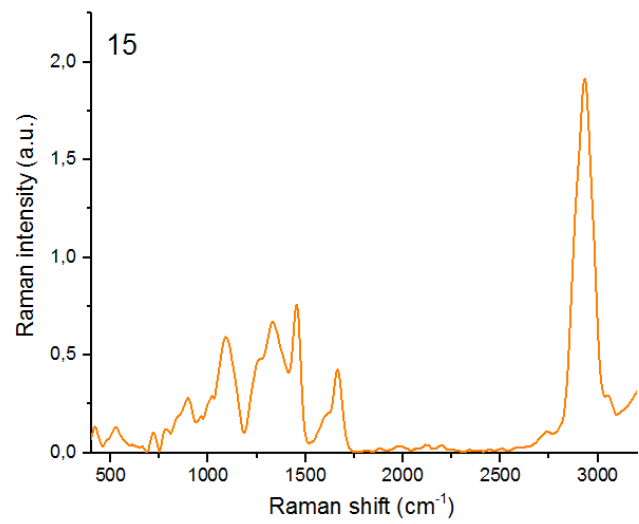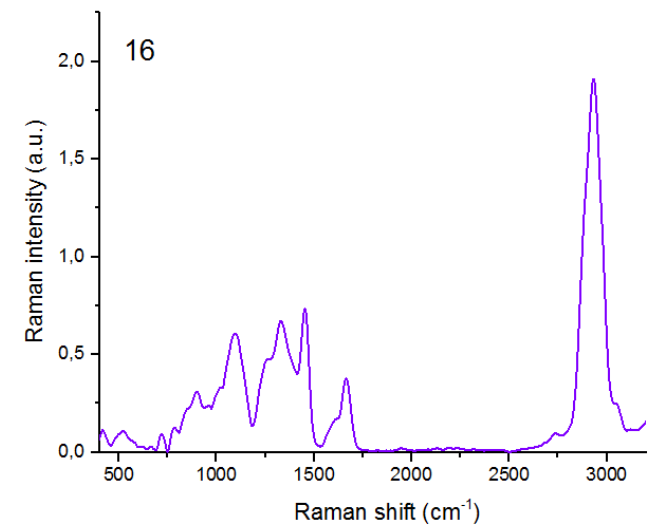

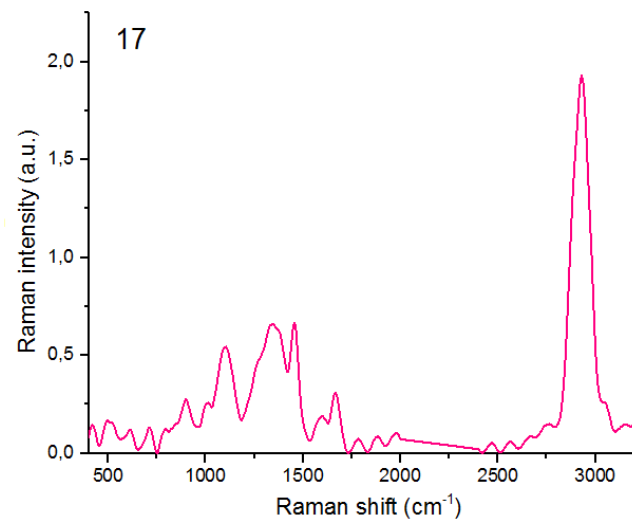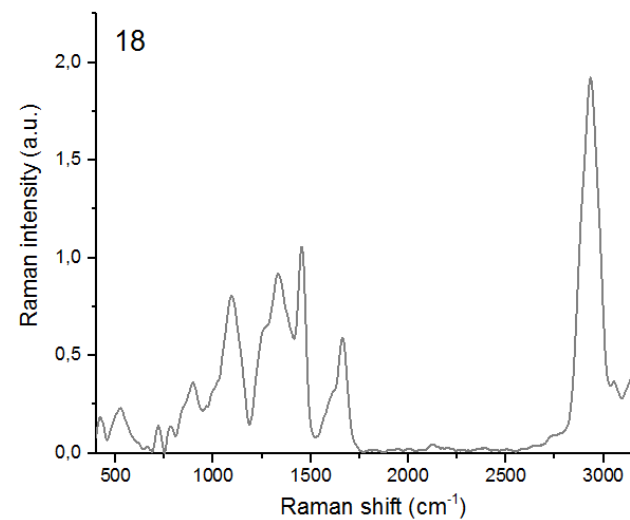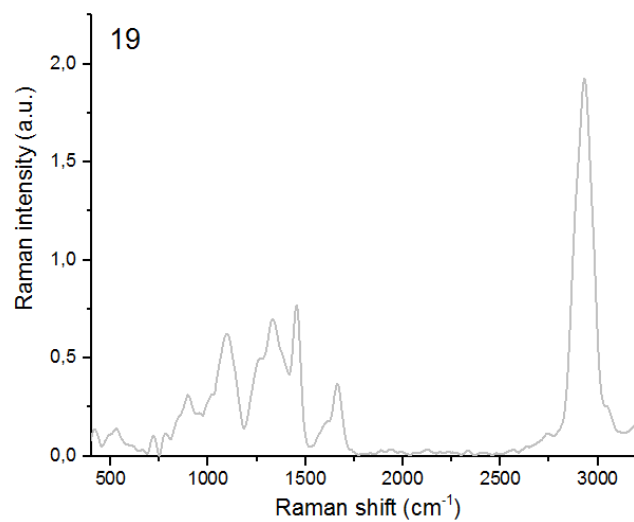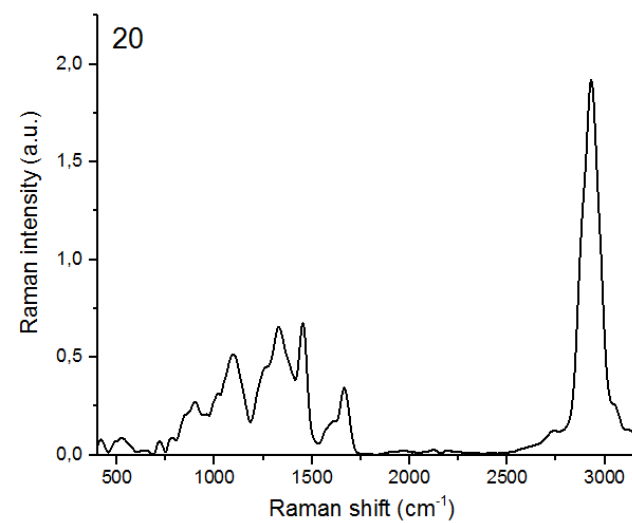

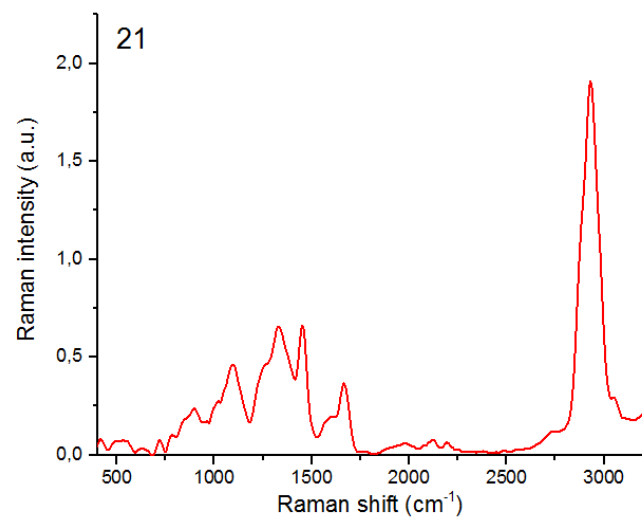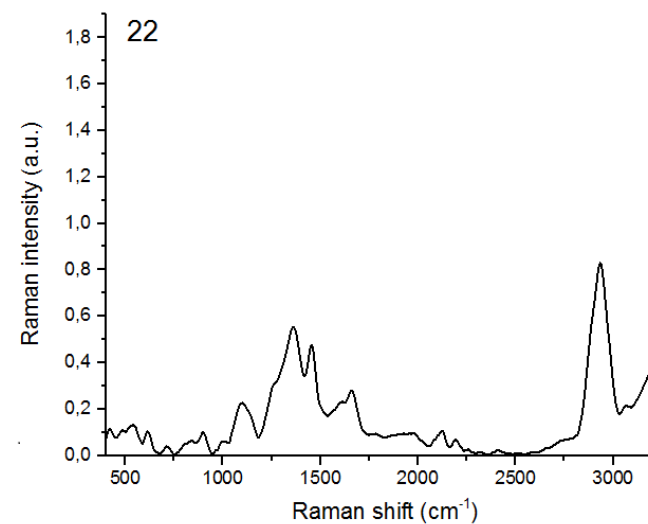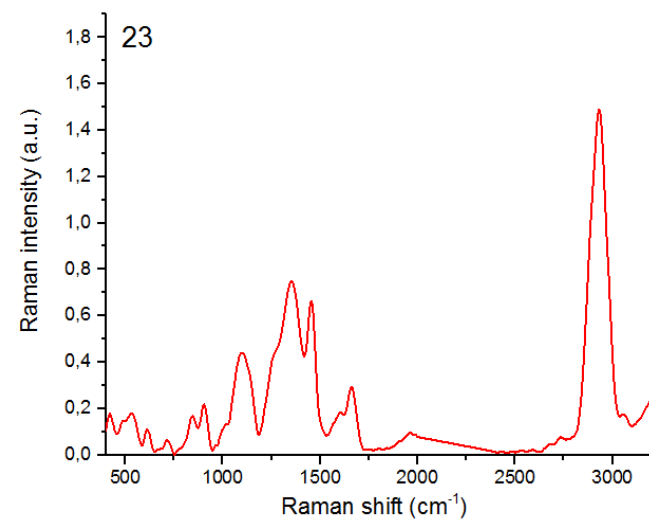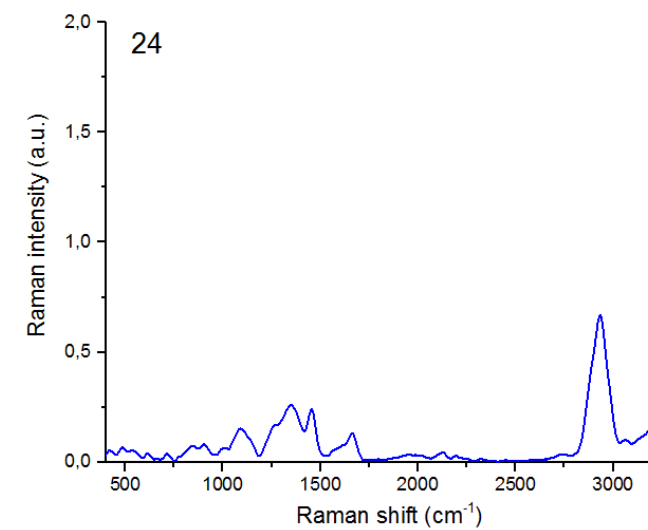

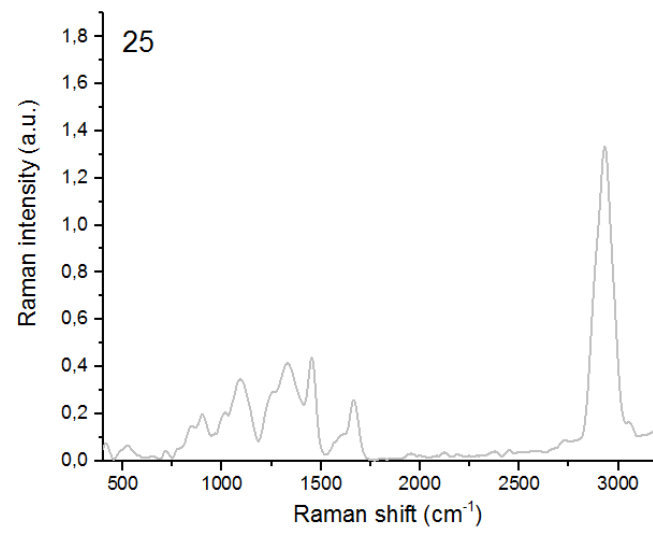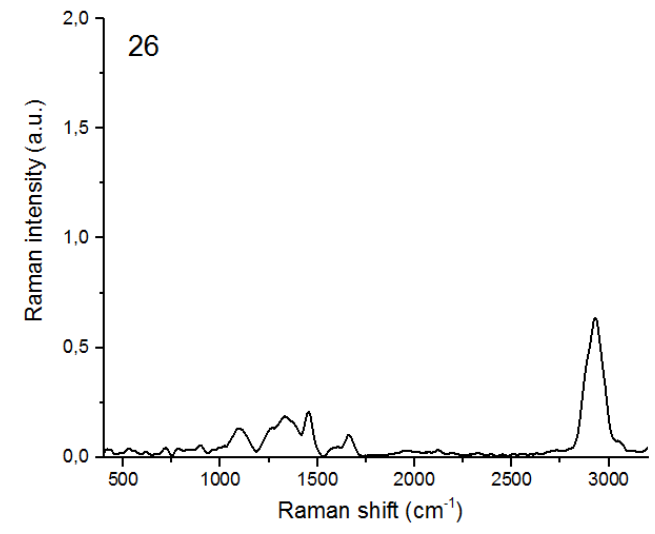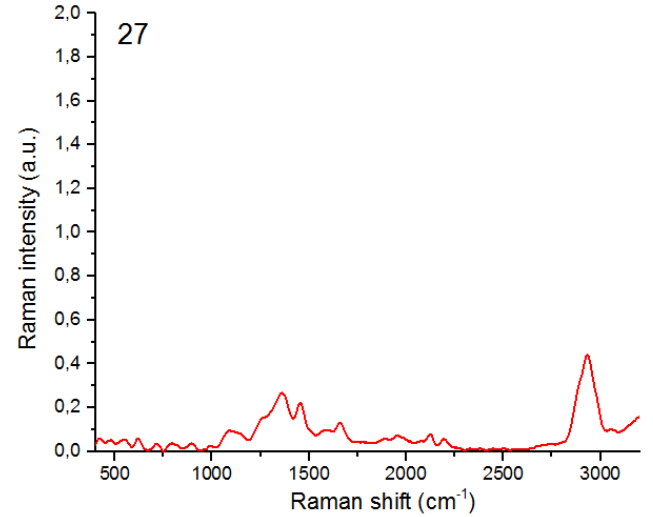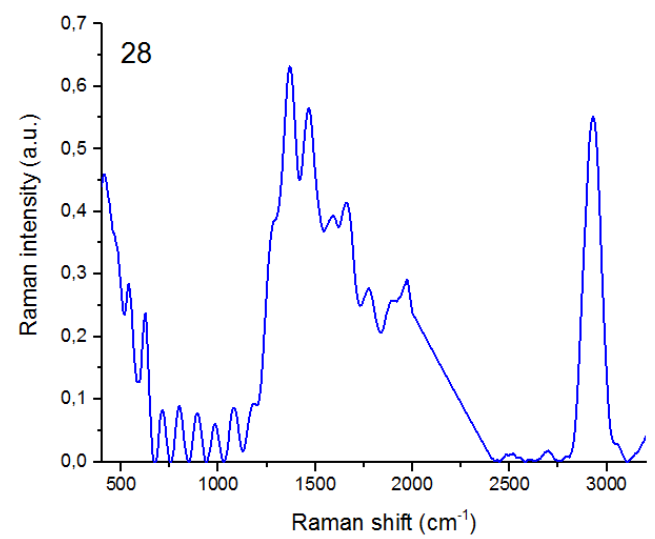

**Supplemental Figure 2.** Raman spectra of clinical *Candida* isolates and reference strains (1-28).

Supplement: s1 [file s1]

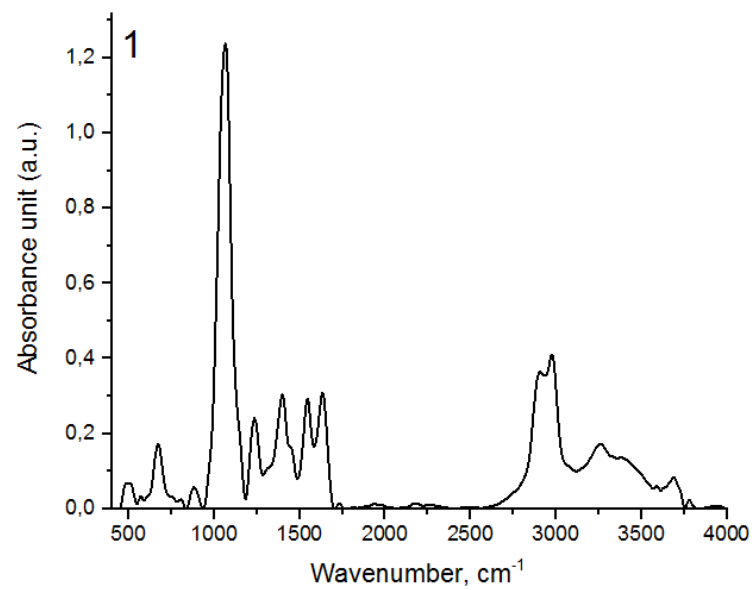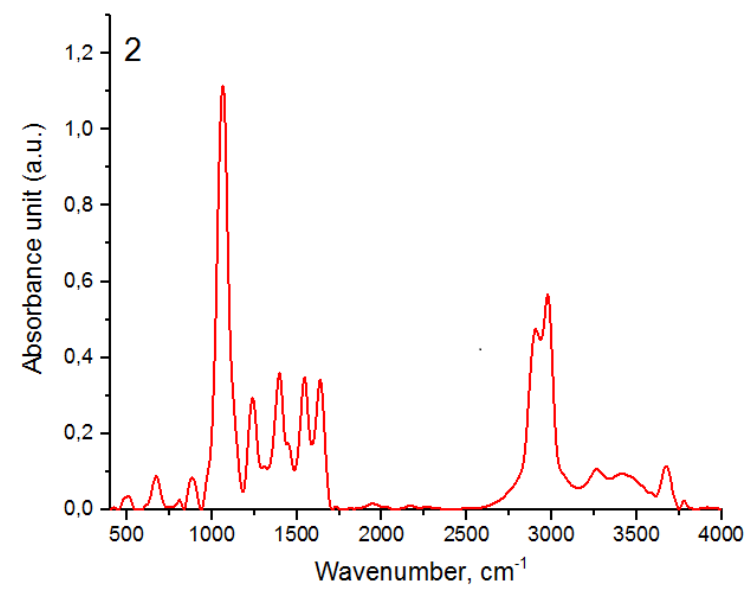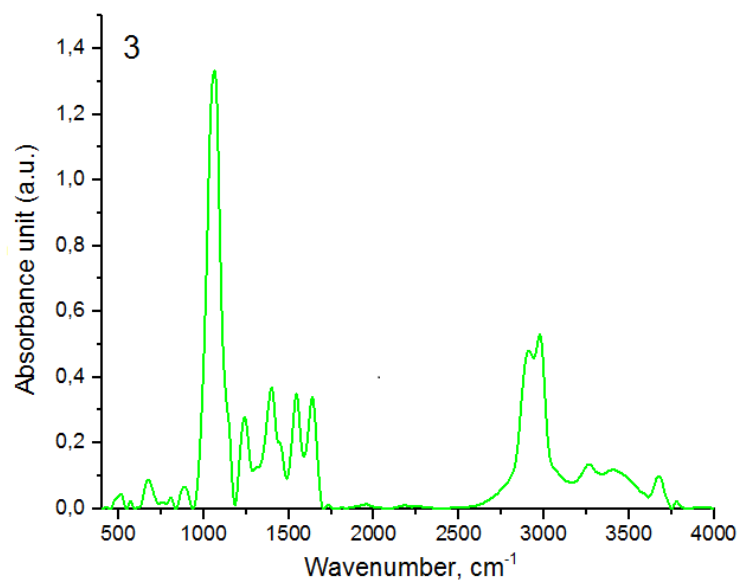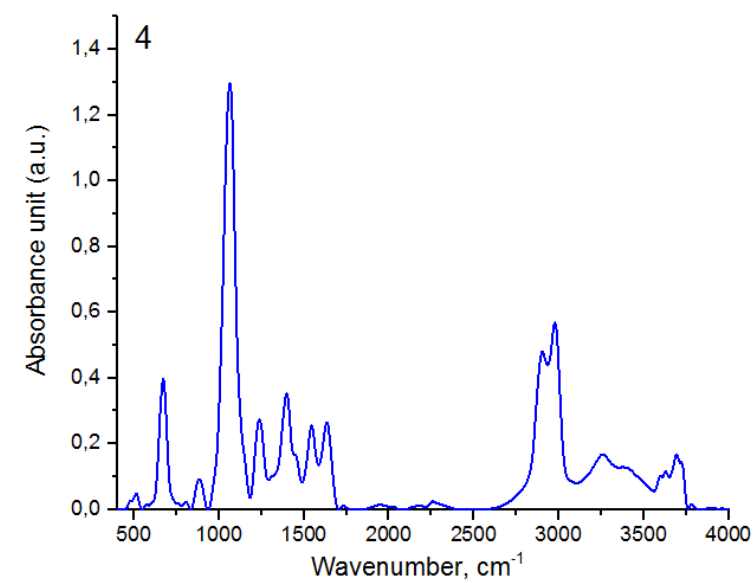

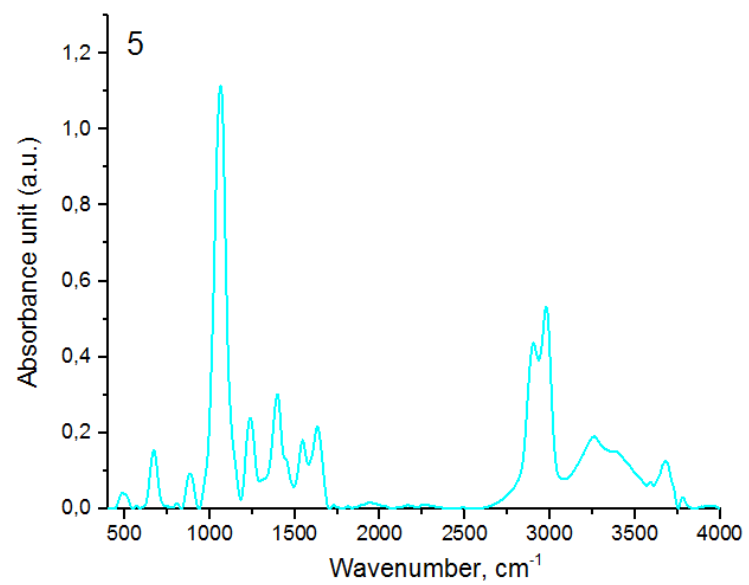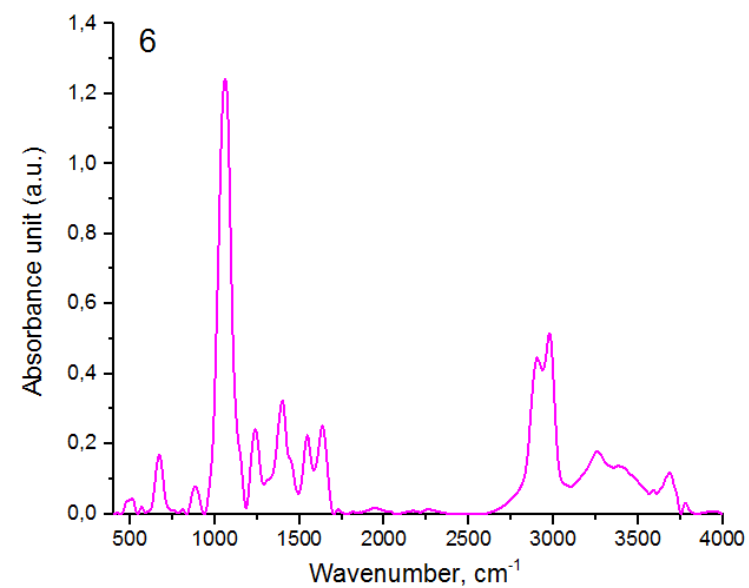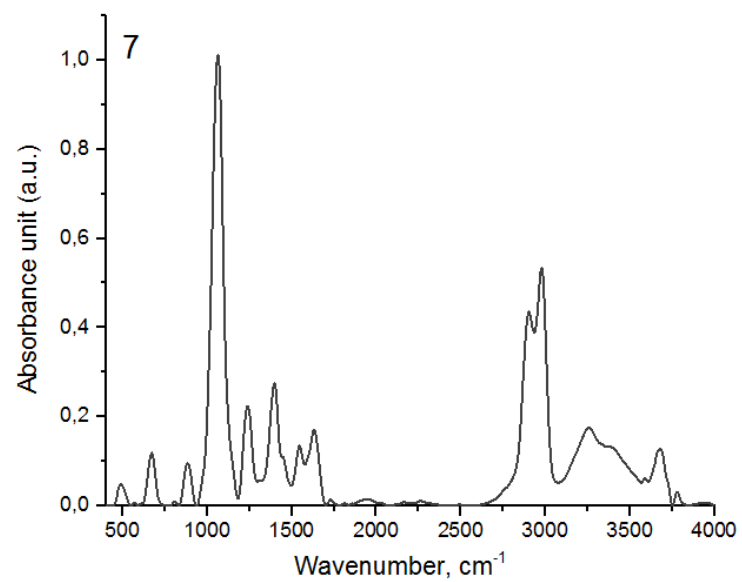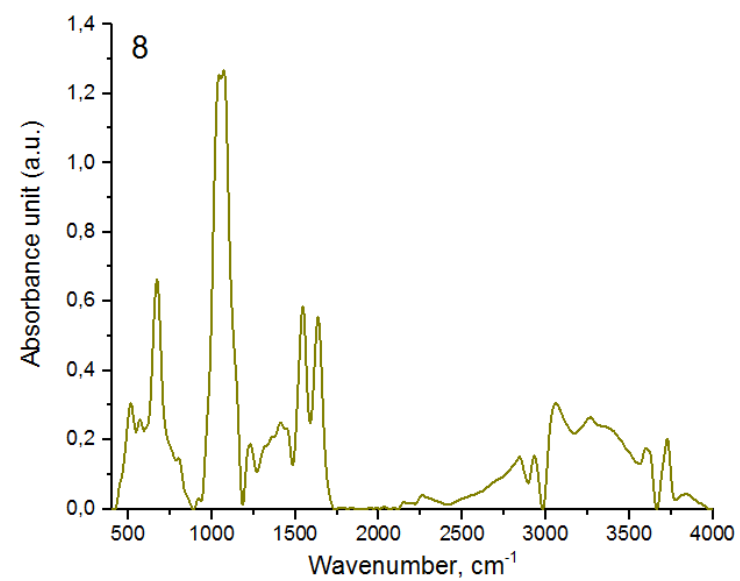

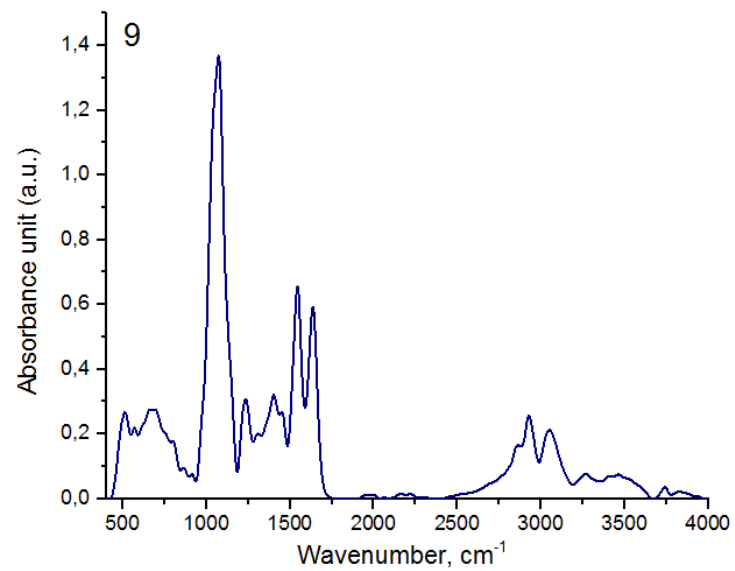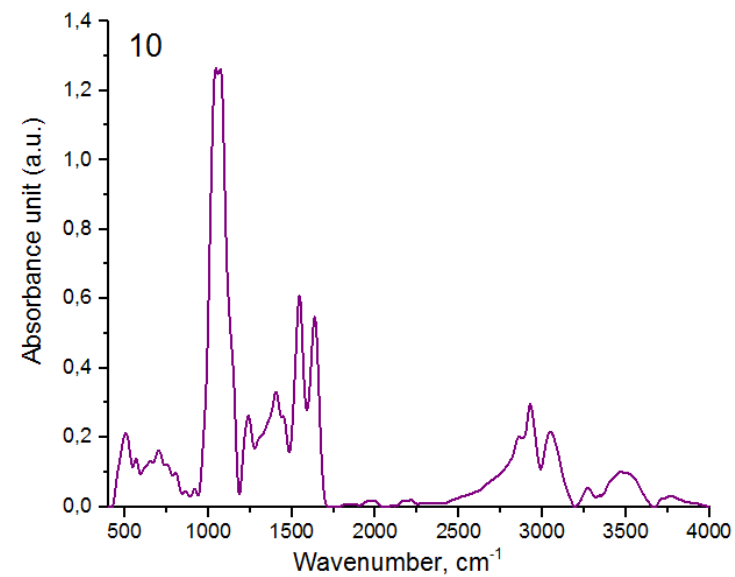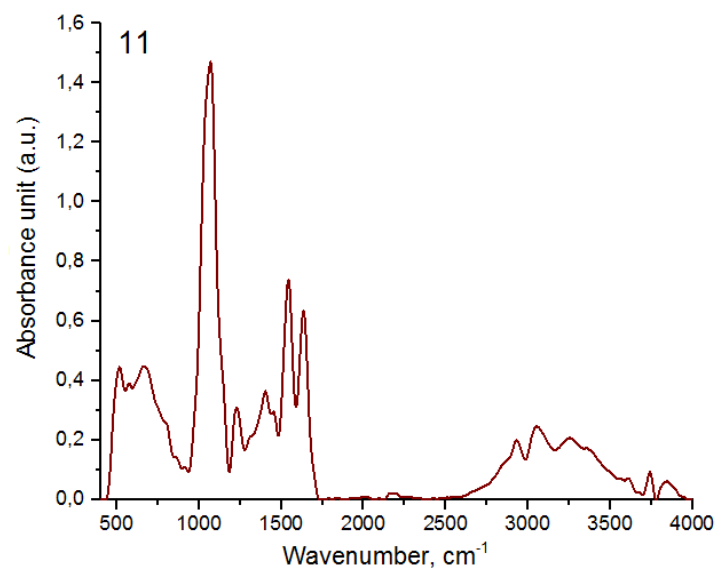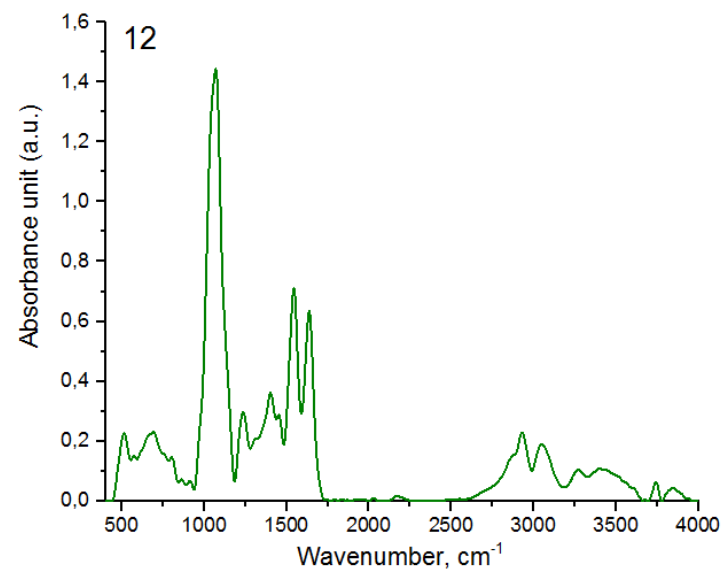

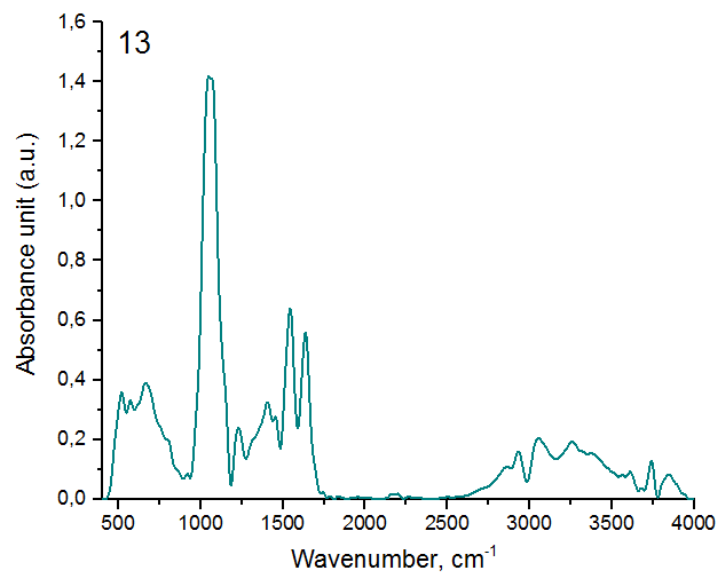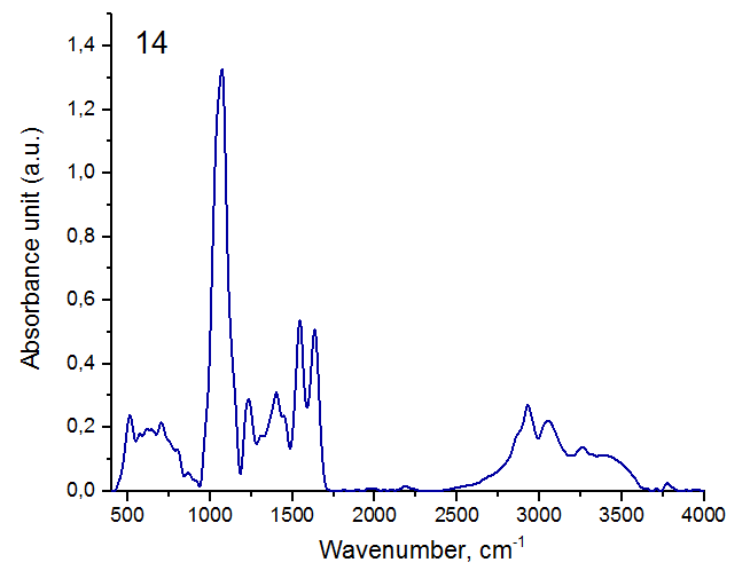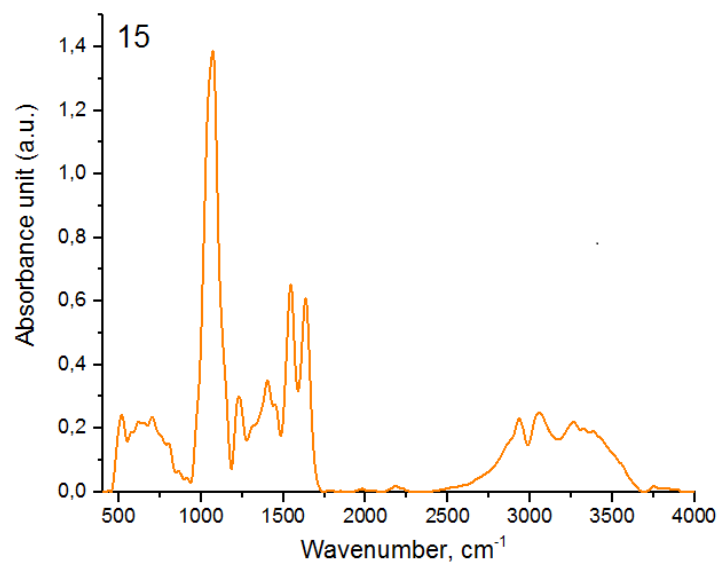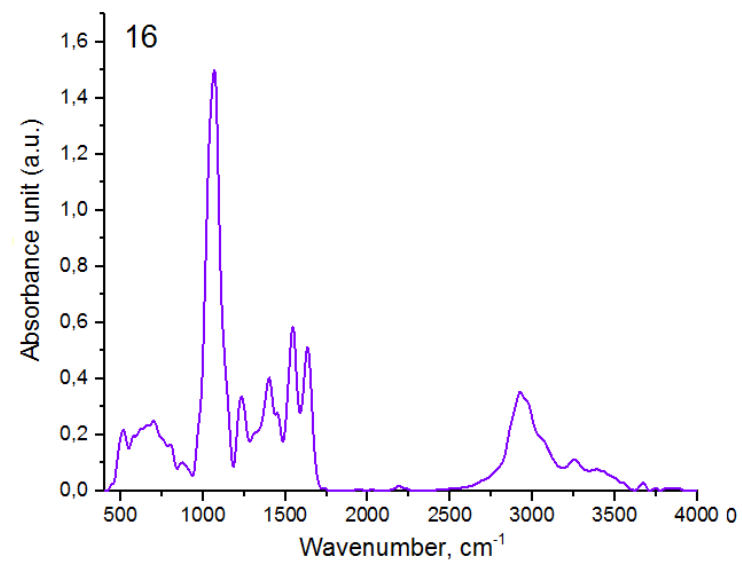

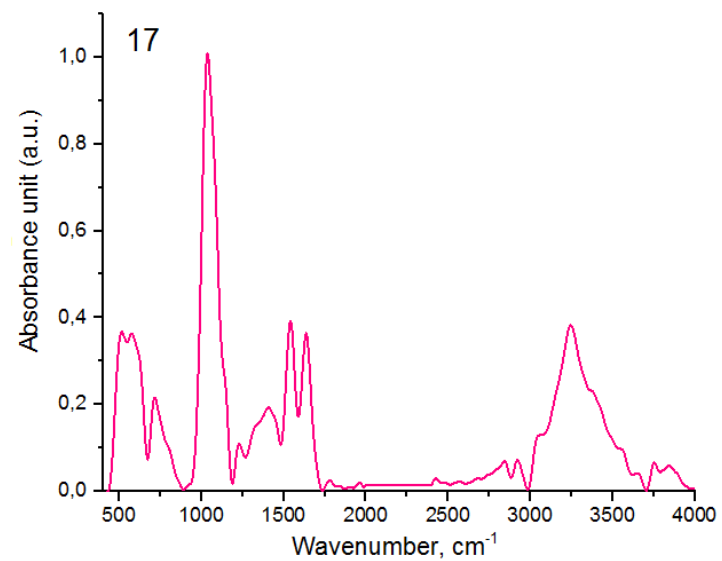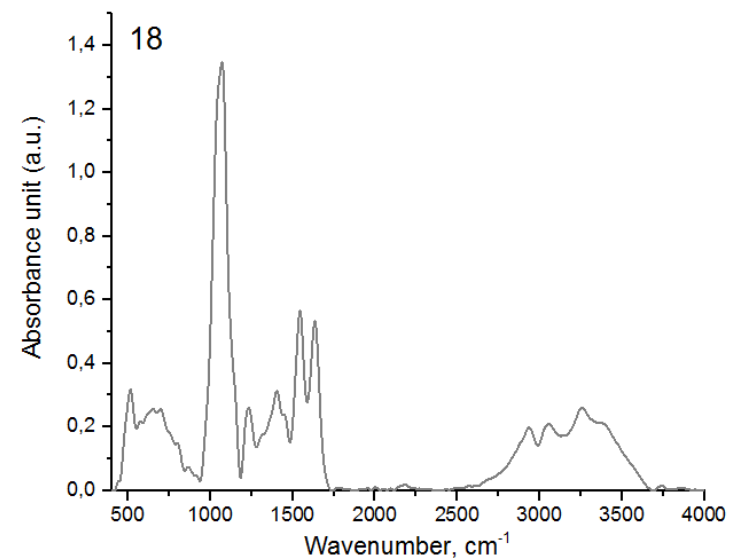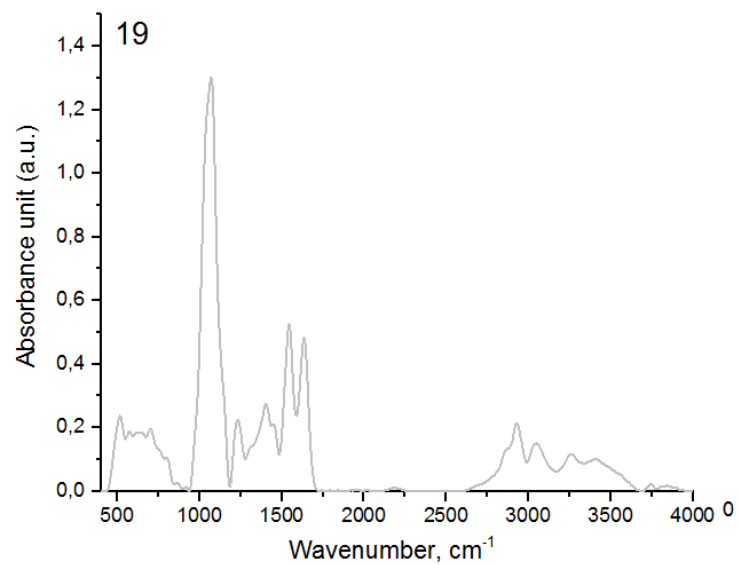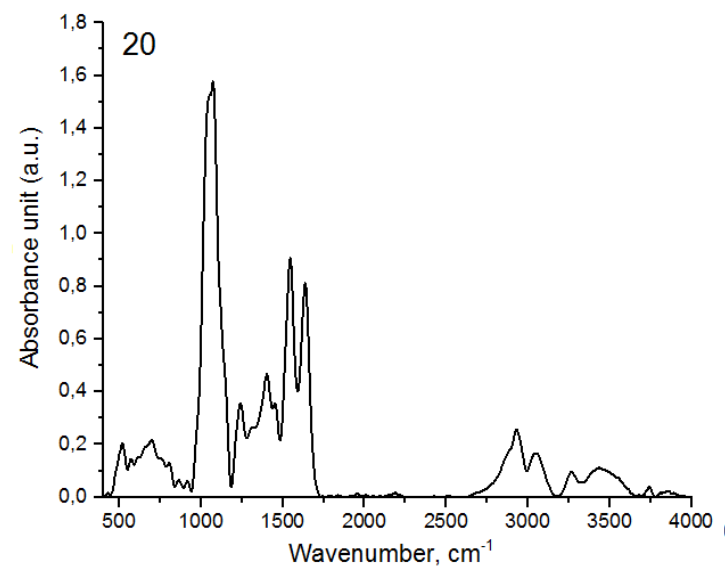

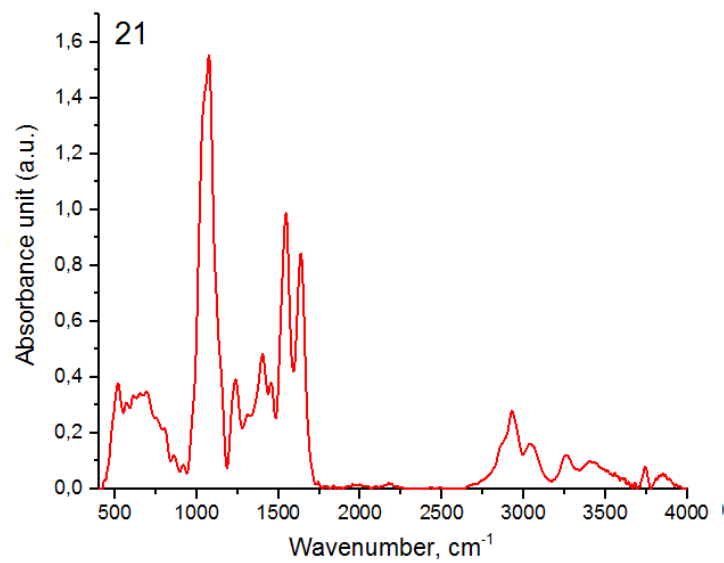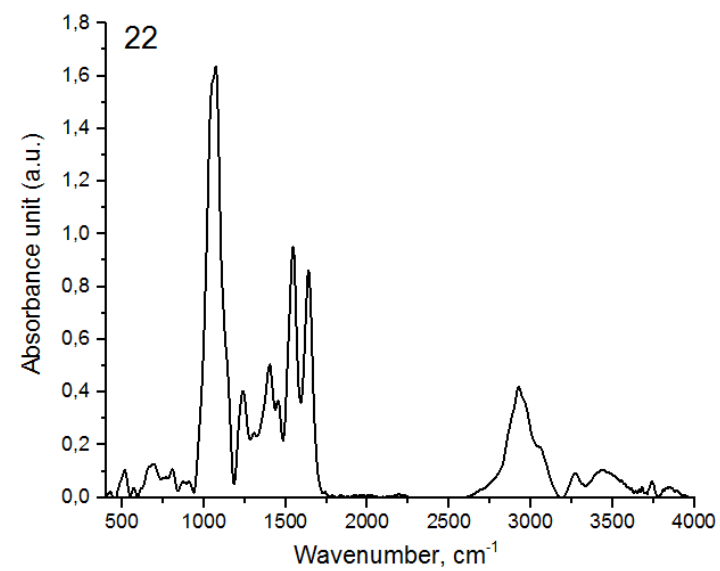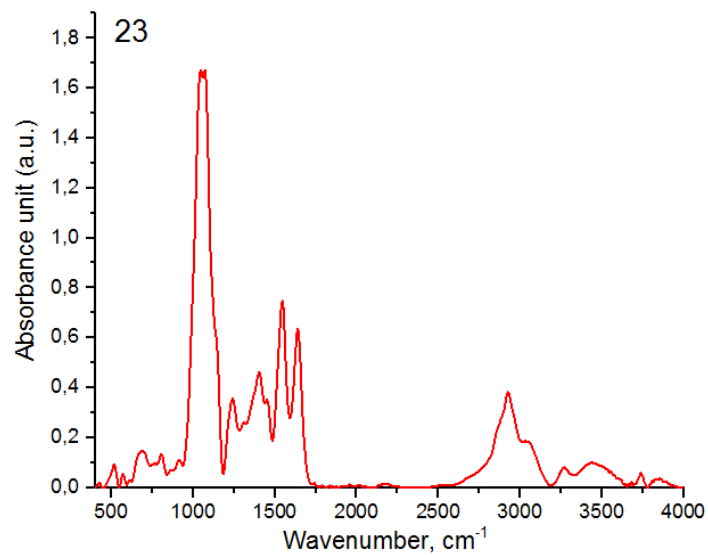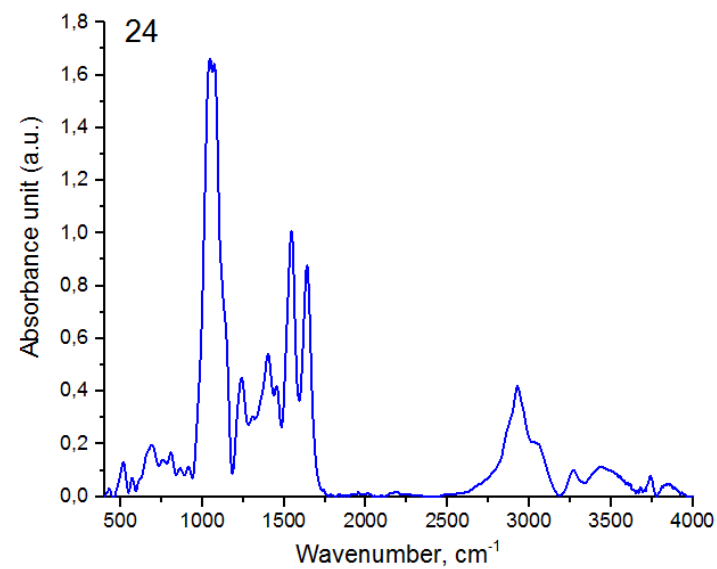

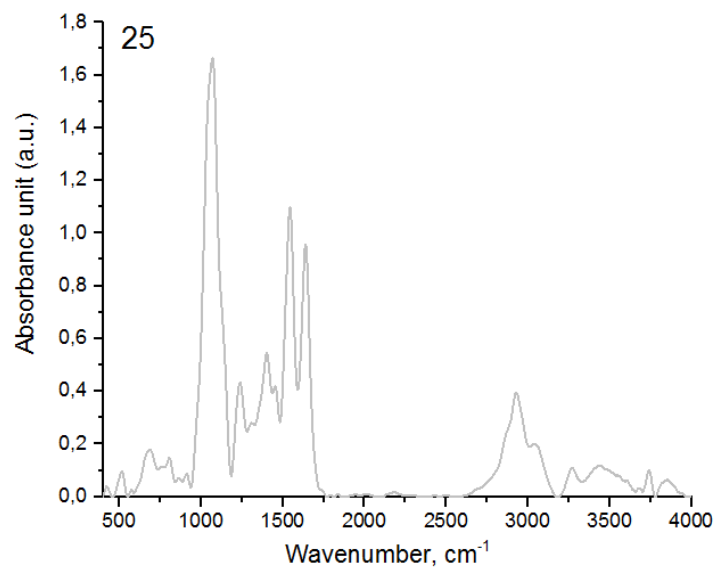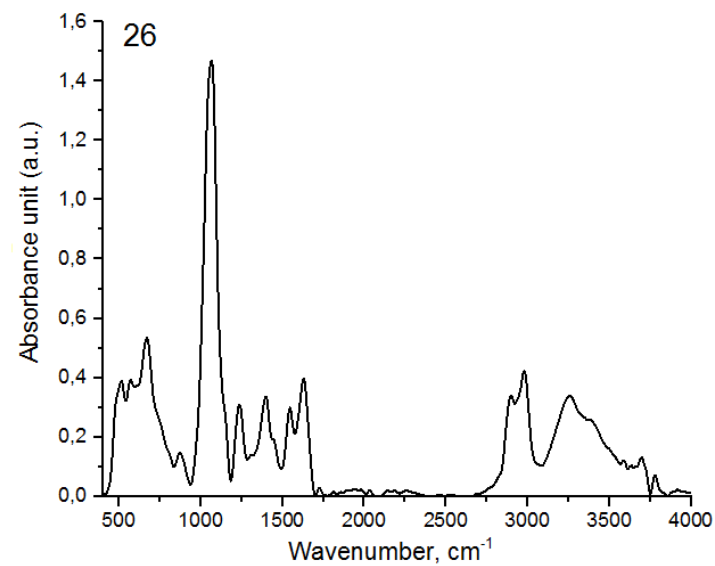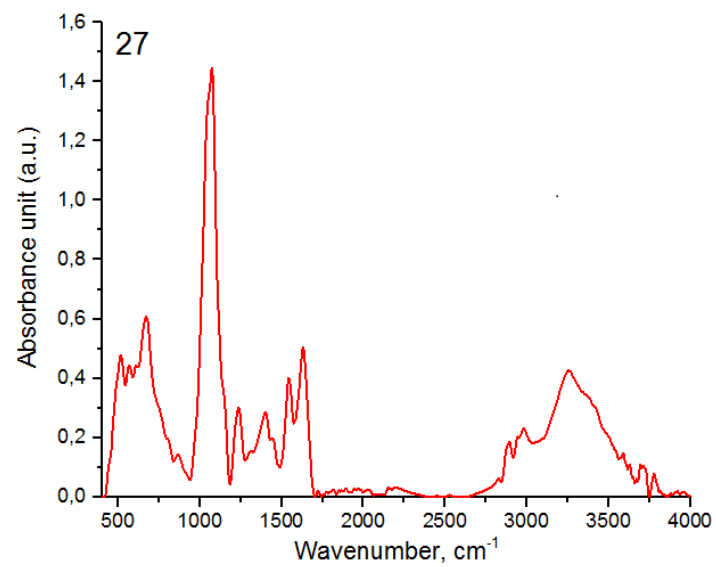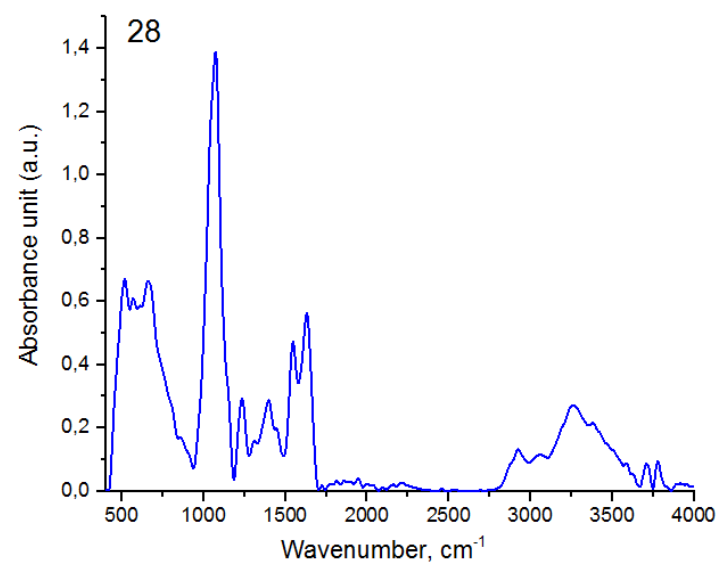

**Supplemental Figure 1.** FTIR spectra of clinical *Candida* isolates and reference strains (1-28).

Supplement: s1 [file s1]
